# Supplementary material
Source: PubMed Central journal article supplement (PMC3750707)
Supplement: NIHMS445927-supplement-1.pdf [file NIHMS445927-supplement-1.pdf]

# Supplemental Material

## Supplemental Methods:

### *Dose response of NSCLC cells to Genexol-PM*

NSCLC cells were seeded at 10,000 cells/well in a 96-well plate. Cells were treated with Genexol-PM for 48 h and washed twice with media. Cell viability was determined using MTS assay (3-(4,5-dimethylthiazol-2-yl)-5-(3-carboxymethoxyphenyl)-2-(4-sulfophenyl)-2H-tetrazolium, inner salt) (Promega, Madison, WI). MTS results were measured on a Biotek Synergy 2 plate reader (Winooski, VT).

### Clonogenic survival assay

Cells were seeded at densities ranging from 100 to 200,000 cells in 4ml of culture medium in 25ml flasks 1 day prior to treatment. Cells were treated with equivalent paclitaxel doses of Taxol (1.18 ng/ml) or Genexol-PM (10 ng/mL) for 24 h and washed 3 times with fresh media after incubation. Cells were then irradiated with 0, 2, 4, 6, or 8 Gy. Cells were incubated and counted as described previously (7). Data was analyzed using Origin Pro 8.6 software. Polynomial curve fitting was performed using 2nd polynomial order.

## Supplemental Figure 1

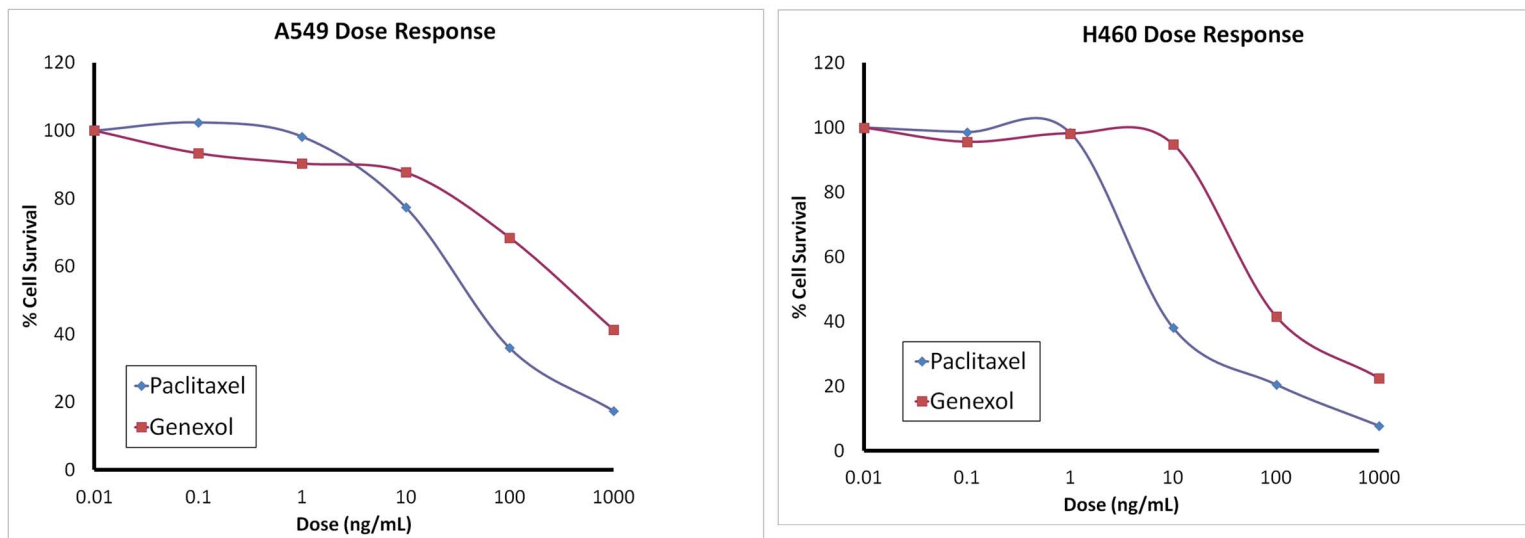

Supplemental Figure 1. Genexol-PM dose-response curve in NSCLC cell lines. NSCLC cell lines were treated with different doses of Genexol-PM or Taxol. Cell viability was determined by MTS assay.
