# Supplementary material
Source: PubMed Central journal article supplement (PMC3750707)
Supplement: NIHMS445927-supplement-2.pdf [file NIHMS445927-supplement-2.pdf]

# Supplemental Figure 2

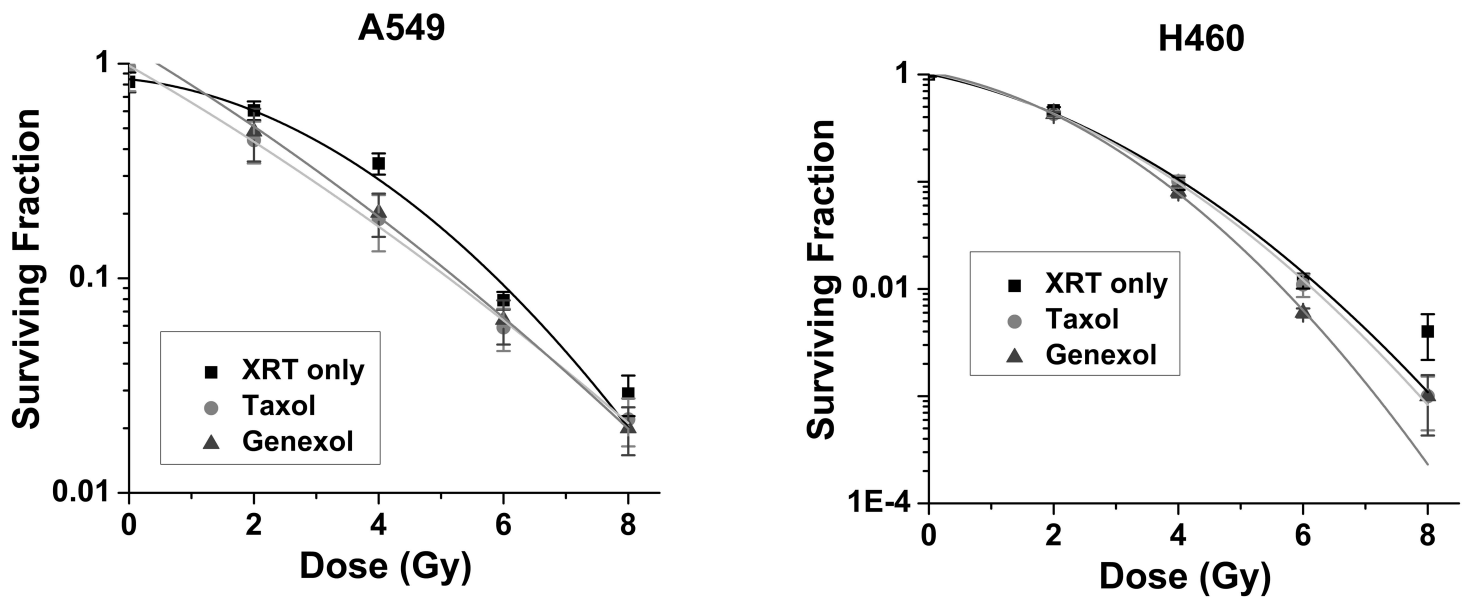

Supplemental Figure 2. Efficacy of Genexol-PM as a radiosensitizer in NSCLC cell lines in vitro. A549 and H460 NSCLC cells were treated with saline, Taxol or Genexol-PM. The cells were then irradiated at different doses (2 Gy, 4 Gy, 6 Gy, and 8 Gy). Surviving fractions of the cells were calculated at each radiotherapy dose and radiation survival curves were generated. Error bars correspond to standard error of the mean (3 samples per time point).

# Supplemental Figure 3

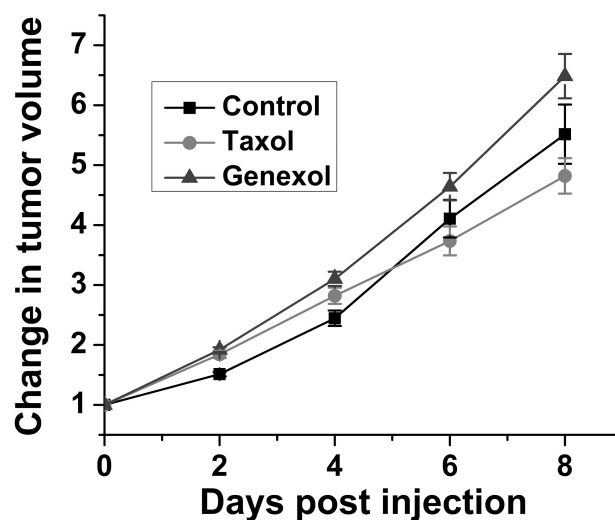

Supplemental Figure 3. Efficacy of Genexol-PM and Taxol as a chemotherapy for NSCLC cell lines in vivo. Mice bearing flank H460 tumor xenografts were administered via tail vein injection (i.v.) saline, Taxol (2.5 mg/kg) or Genexol-PM (21.5 mg/kg). Changes in tumor volume were measured and the tumor growth delay curves were generated.
